# Supplementary material for: Estimating sources and sinks of malaria parasites in Madagascar
Source: PubMed Central journal article supplement (PMC6156502; doi:10.1038/s41467-018-06290-2), 2018-09-25
Supplement: 41467_2018_6290_MOESM2_ESM.pdf [file 41467_2018_6290_MOESM2_ESM.pdf]

## **Description of Additional Supplementary Files**

File Name: Supplementary Data 1

Description: The estimated amount of parasite importation between communes using the districtlevel mean PfPR value (origin: row, destination: column).

File Name: Supplementary Data 2

Description: The estimated amount of parasite importation between communes using the districtlevel maximum PfPR value (origin: row, destination: column).

File Name: Supplementary Data 3

Description: The estimated amount of parasite importation between communes using the districtlevel minimum PfPR value (origin: row, destination: column).

File Name: Supplementary Data 4

Description: Mobile phone coverage estimates from the Malaria Indicator Survey.

File Name: Supplementary Data 5

Description: Reported cases by the National Malaria Control Programme.
